# Supplementary material
Source: ML conference proceedings conference paper supplement (https://openreview.net/forum?id=ef0nInZHKIC)

DM Models

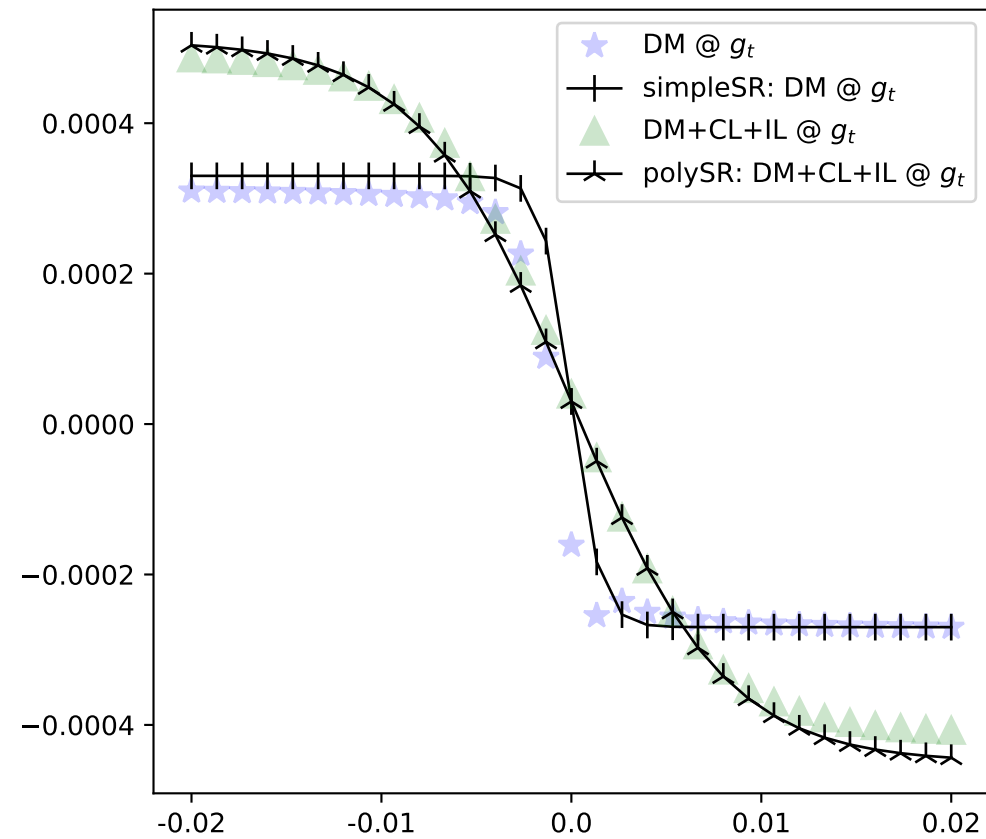

RP Model

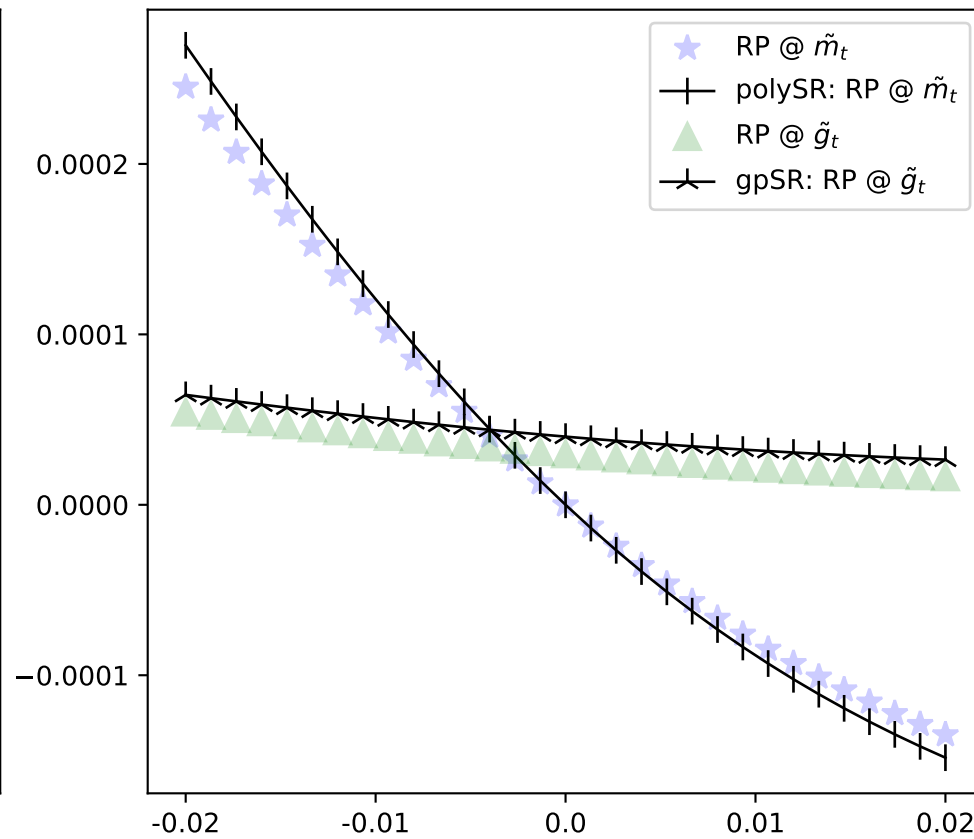

RP\_si model

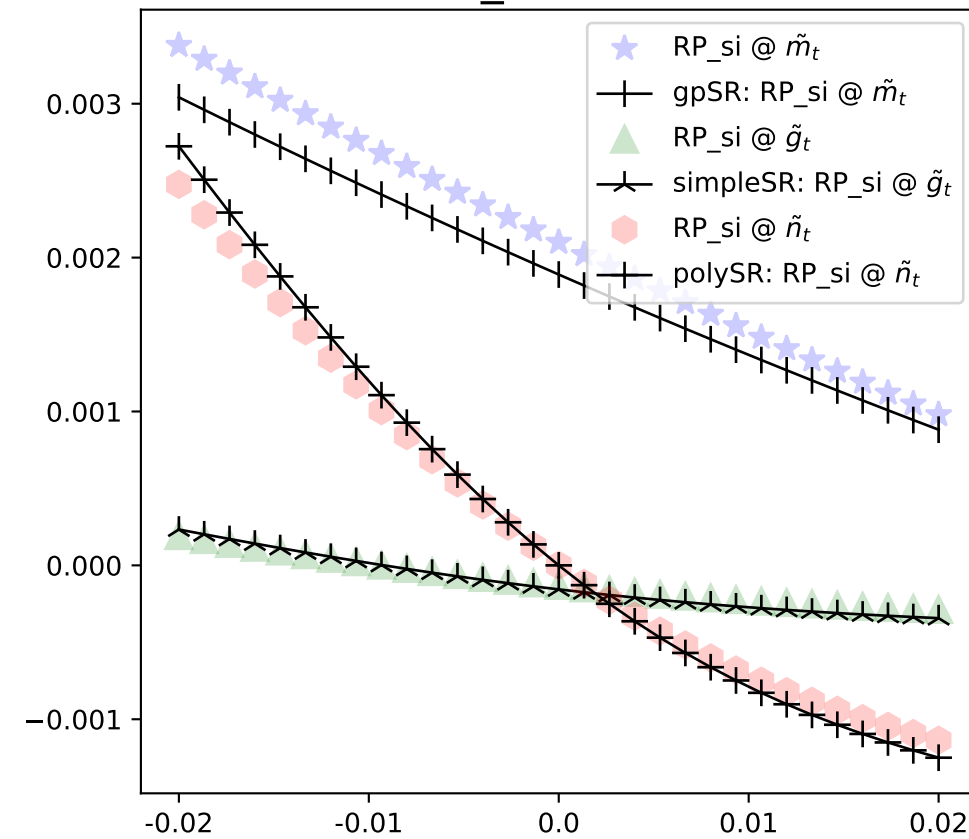

Hand-Crafted Optimizers

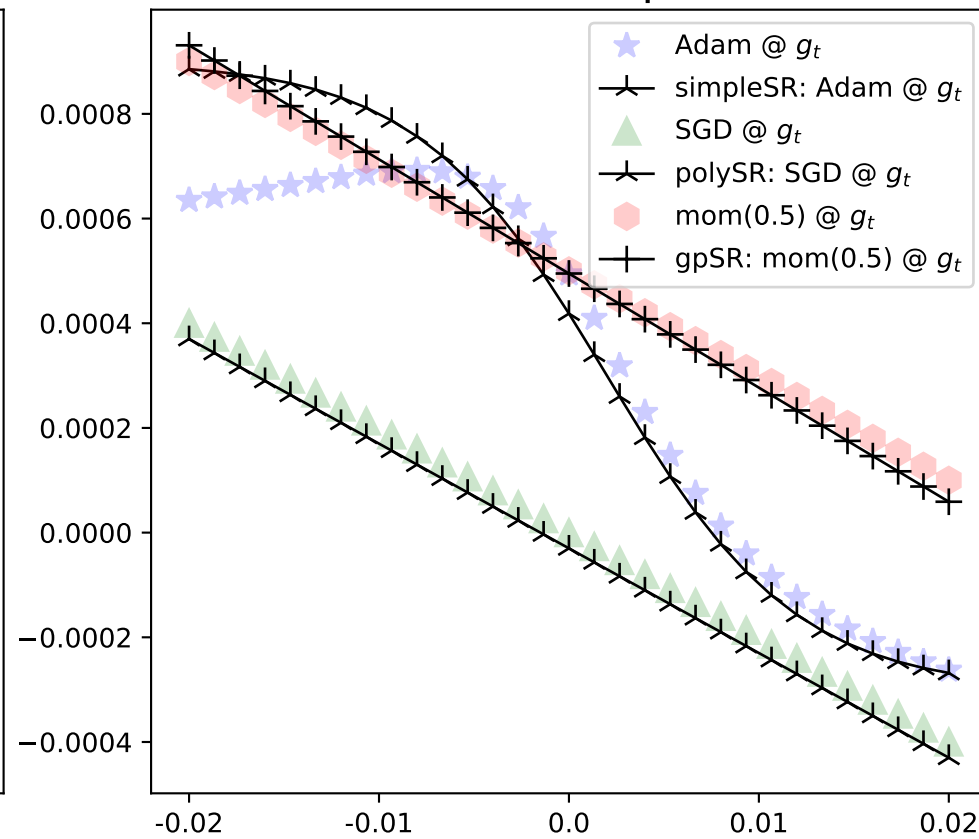

Supplement: supplementary_material [file attachment]

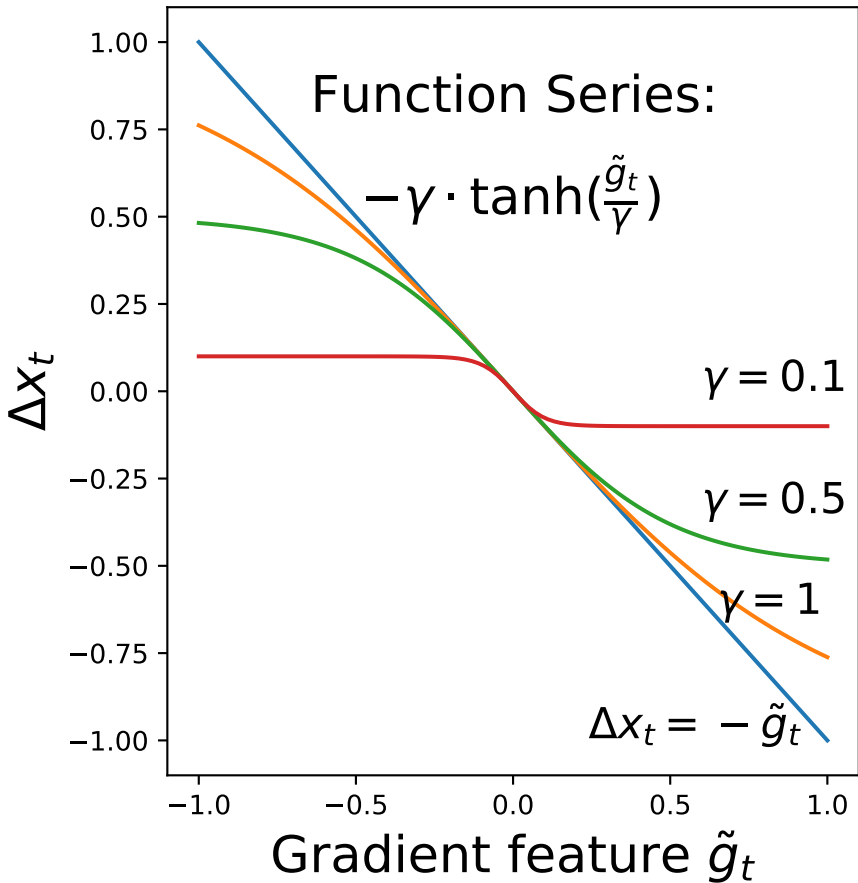

Supplement: supplementary_material [file attachment]

ResNet50 on Cifar10

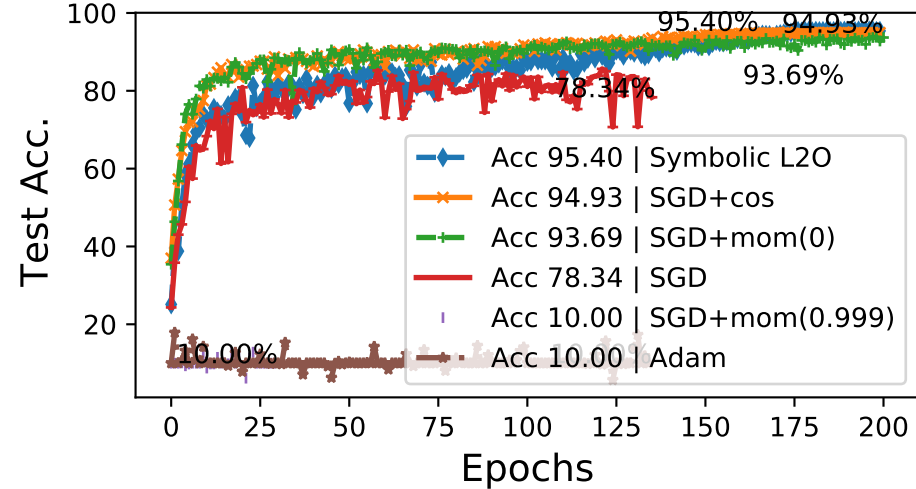

ResNet152 on Cifar100

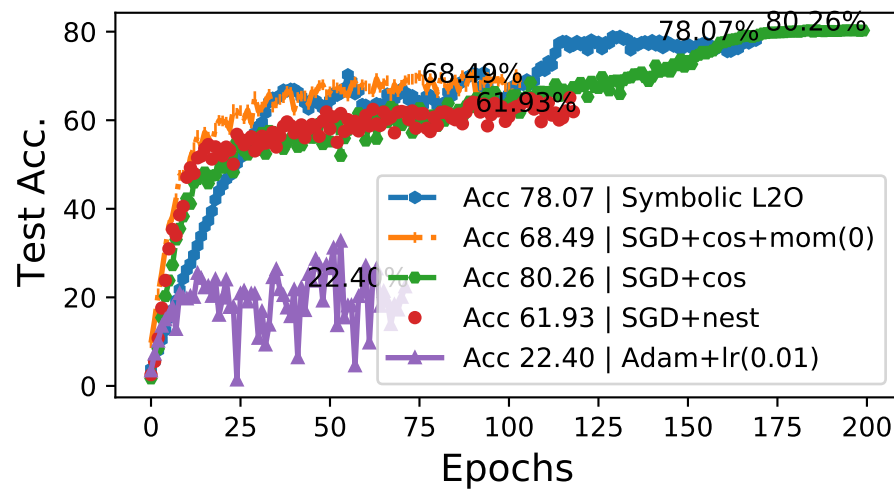

MobileNetV2 on Cifar100

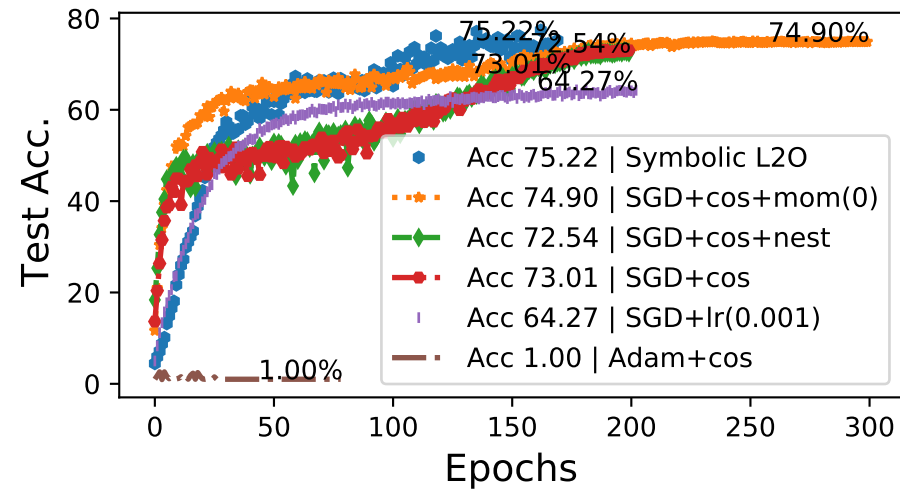

Supplement: supplementary_material [file attachment]
